# Supplementary material
Source: publisher figshare collection journal article supplement (https://acs.figshare.com/ndownloader/files/11941175)
Supplement: Supplementary file 1 [file 11941175]

# Supplemental Information

## ZnO microstructures as flame retardant coatings on cotton fabrics

*Yi-Wei Wang,<sup>†</sup> Ruiqing Shen,<sup>§</sup> Qingsheng Wang,<sup>§</sup> and Yolanda Vasquez<sup>†,\*</sup>*

<sup>†</sup>Department of Chemistry, 107 Physical Sciences I, Oklahoma State University, Stillwater, OK  
74078, United States

<sup>§</sup>Departments of Chemical Engineering and Fire Protection & Safety, Oklahoma State  
University, Stillwater, Oklahoma 74078, United States

**Table SI 1.** The final residue of samples after combustion

|                          | Residue mass (g) | Residue percentage (%) |
|--------------------------|------------------|------------------------|
| Scoured cotton           | 0.692            | 6.06                   |
| ZnO microparticles       | 0.596            | 5.31                   |
| ZnO + ZnS microparticles | 0.616            | 5.08                   |
| ZnO seeds                | 0.873            | 7.71                   |
| ZnO short rods           | 1.71             | 14.3                   |
| ZnO rods                 | 9.62             | 49.1                   |
| ZnO/ZnS rods             | 9.41             | 48.0                   |

**Table SI 2.** The smoke data of samples from cone calorimeter

|                          | Mean SEA (m <sup>2</sup> /kg) | Total Smoke Release (m <sup>2</sup> /m <sup>2</sup> ) |
|--------------------------|-------------------------------|-------------------------------------------------------|
| Scoured cotton           | 13.76 (2.1)                   | 16.06 (1.9)                                           |
| ZnO microparticles       | 10.25 (0.44)                  | 9.900 (2.1)                                           |
| ZnO + ZnS microparticles | 8.200 (1.1)                   | 12.13 (0.32)                                          |
| ZnO seeds                | 10.90 (2.5)                   | 12.60 (2.1)                                           |
| ZnO rods                 | 6.583 (2.3)                   | 7.433 (2.9)                                           |
| ZnO/ZnS rods             | 6.756 (1.9)                   | 7.867 (2.0)                                           |

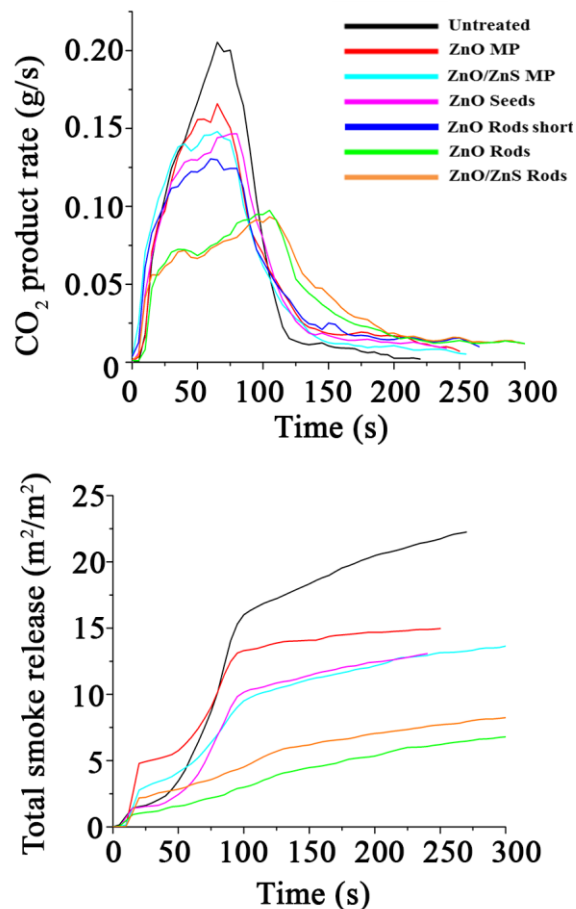

**Figure SI 1** Samples were tested on the cone calorimeter and CO<sub>2</sub> product rate (top) and total smoke release (bottom) graphs were generated.

After ignition, the total smoke release (TSR) increased rapidly within the first 15 to 20 s. After a slight reduction in the subsequent 20 to 25 s, the TSR rapidly increased again until 100 s. This data is consistent with the PkHRR of the materials. At around 75 s, the TSR of untreated cotton samples surpasses all others. Cotton samples coated by ZnO and ZnO/ZnS rods had the lowest TSR.

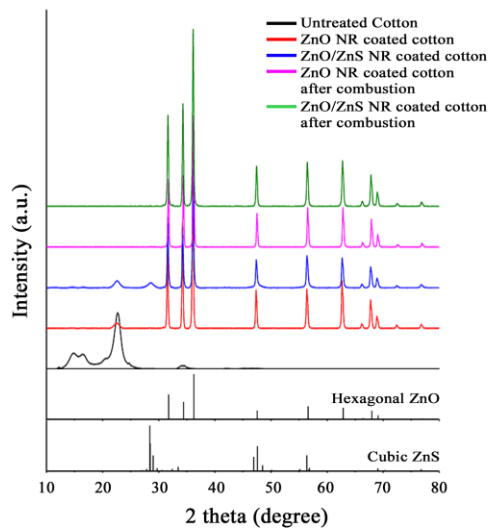

**Figure SI 2.** XRD pattern of ZnO and ZnO/ZnS nanorods coated samples before and after combustion.

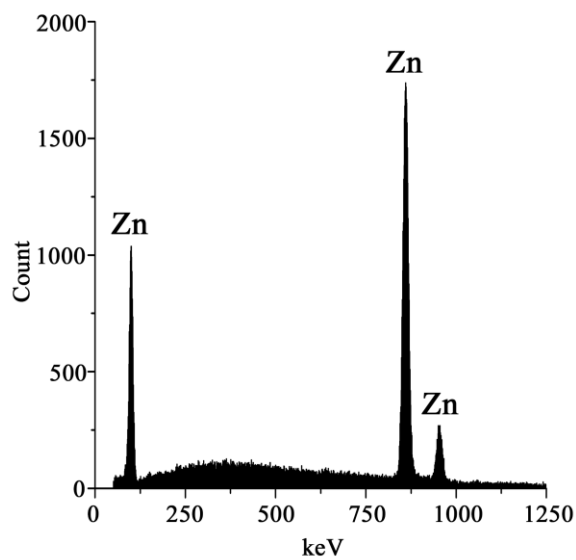

**Figure SI 3.** Energy dispersive X-Ray spectrum of ZnO/ZnS rod coated cotton sample after combustion. Sulfur is converted to SO<sub>2</sub> gas, leaving no trace of sulfur behind.

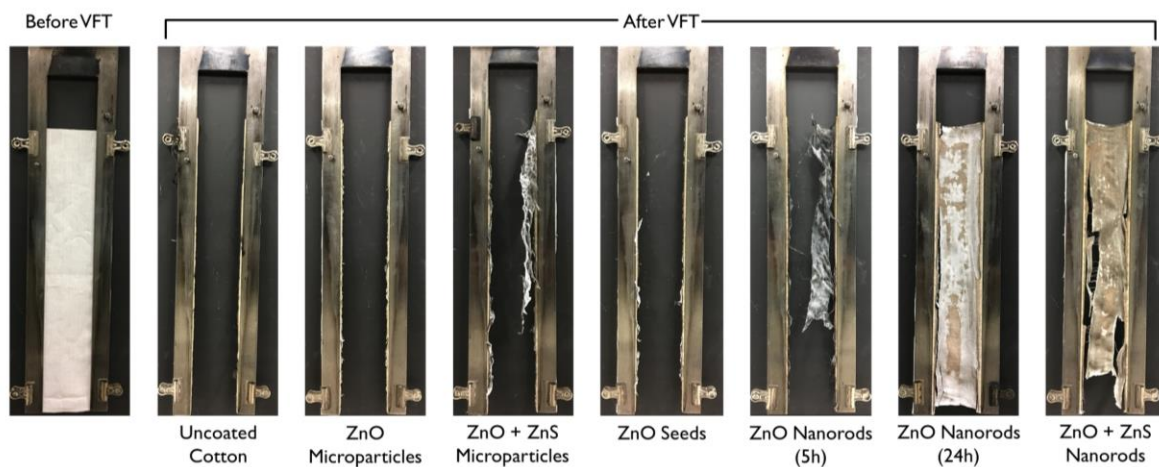

**Figure SI 4.** Pictures of untreated and treated cotton fabrics before and after vertical flame tests.
